# Supplementary material for: Counting Steps: A New Way to Monitor Patients with Pulmonary Arterial Hypertension
Source: Springer Nature journal article supplement (doi:10.1007/s00408-019-00239-y), 2019-05-29

**Supplementary Material**

**Table S1: Correlation of baseline clinical disease severity markers with daily step count in first 2 weeks and six minute walk distance**

|  | **Mean daily step count (2 weeks)** | | **Six minute walk distance** | |
| --- | --- | --- | --- | --- |
|  | **r** | **p** | **r** | **p** |
| **BMI** | **-0.40** | **0.04** | **-0.51** | **0.003** |
| **Age** | -0.11 | 0.5 | **-0.45** | **0.01** |
| **Mean PA pressure** | 0.18 | 0.38 | 0.06 | 0.73 |
| **RA** | -0.09 | 0.66 | -0.35 | 0.06 |
| **CI** | -0.14 | 0.48 | -0.06 | 0.74 |
| **PVR** | 0.15 | 0.47 | -0.04 | 0.83 |
| **NT proBNP** | 0.14 | 0.56 | 0.12 | 0.58 |
| **TAPSE** | -0.22 | 0.33 | -0.05 | 0.79 |
| **RV strain** | 0.09 | 0.70 | 0.17 | 0.47 |
| **EURO-QOL index** | -0.0007 | 0.99 | 0.23 | 0.21 |
| **EURO-QOL VAS** | 0.28 | 0.17 | -0.05 | 0.79 |

**Data presented as correlation coefficients, r. BMI- Body mass index, CI- Cardiac Index, PA- pulmonary artery, PVR- pulmonary vascular resistance, Ra- right atrium, RV- right ventricular, TAPSE- Tricuspid annular plane systolic excursion, VAS- visual analog scale**

**Table S2: Accelerometer use questionnaire**

|  | **Using the Fitbit ®every day is an acceptable method to measure my daily activity** | **It was easy to remember to use the Fitbit® everyday** | **Using the Fitbit® did not interfere with my daily routine** | **Fitbit® is technically easy to use** | **It is easy to charge the Fitbit®** | **Using the Fitbit® motivated me to be more active** | **I would wear the Fitbit® again as a part of my daily routine outside of a research study** |
| --- | --- | --- | --- | --- | --- | --- | --- |
| **Strongly agree (% patients)** | **52.3 %** | **57.1 %** | **66.6 %** | **70 %** | **57.1 %** | **42.8 %** | **52.3 %** |
| Agree  (% patients) | 38.0 % | 38 % | 23.8 % | 25 % | 28.5 % | 19.0 % | 28.5 % |
| Neither (%patients) | 0 % | 4.7 % | 4.7 % | 5 % | 9.5 % | 28.5 % | 14.2 % |
| Disagree  (% patients) | 4.7 % | 0 % | 4.7 % | 0 % | 4.7 % | 9.5 % | 4.7 % |
| Strongly disagree  (% patients) | 4.7 % | 0 % | 0 % | 0 % | 0 % | 0% | 0 % |

**Data presented as percentage of patients**

**Figure S1- six minute walk distance and mean daily step count in patients with WHO functional class 1/2 vs WHO functional class 3/4**

**
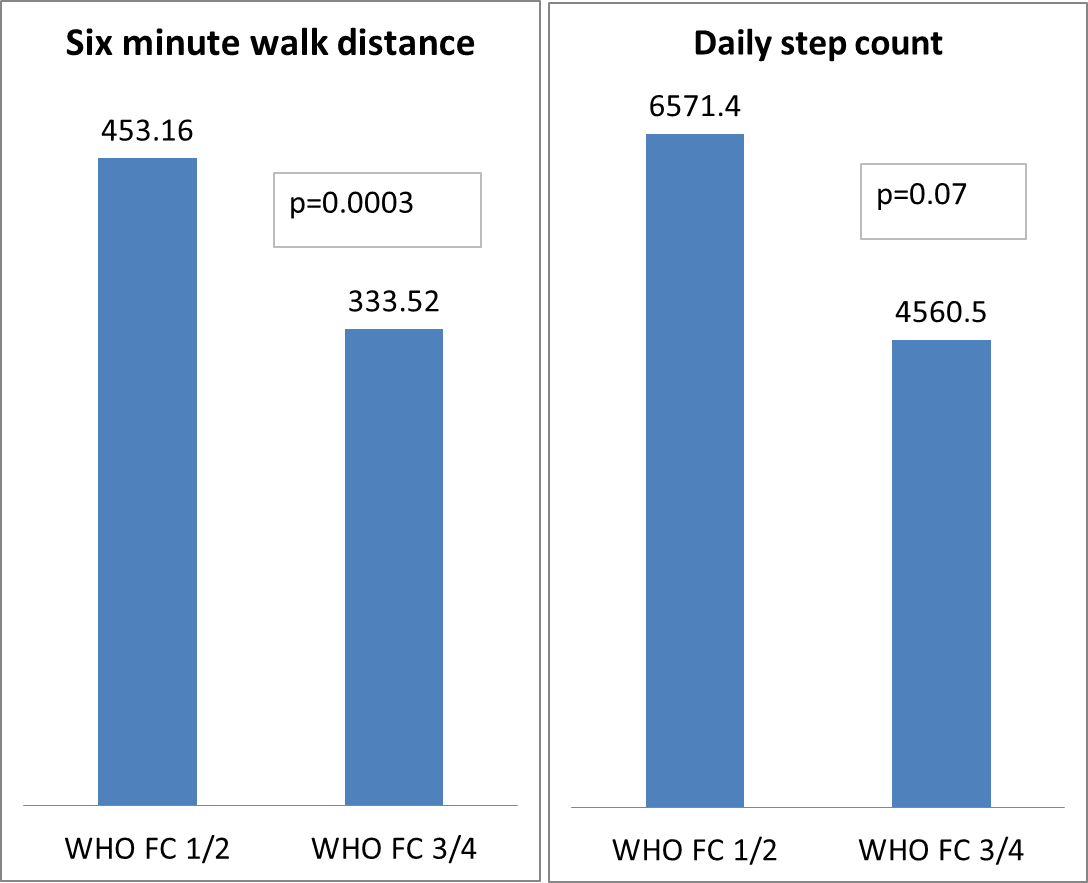
**

**WHO FC- world health organization functional class**

**Figure S2- Change in 6MWD and SPD slope in individual patients**

**
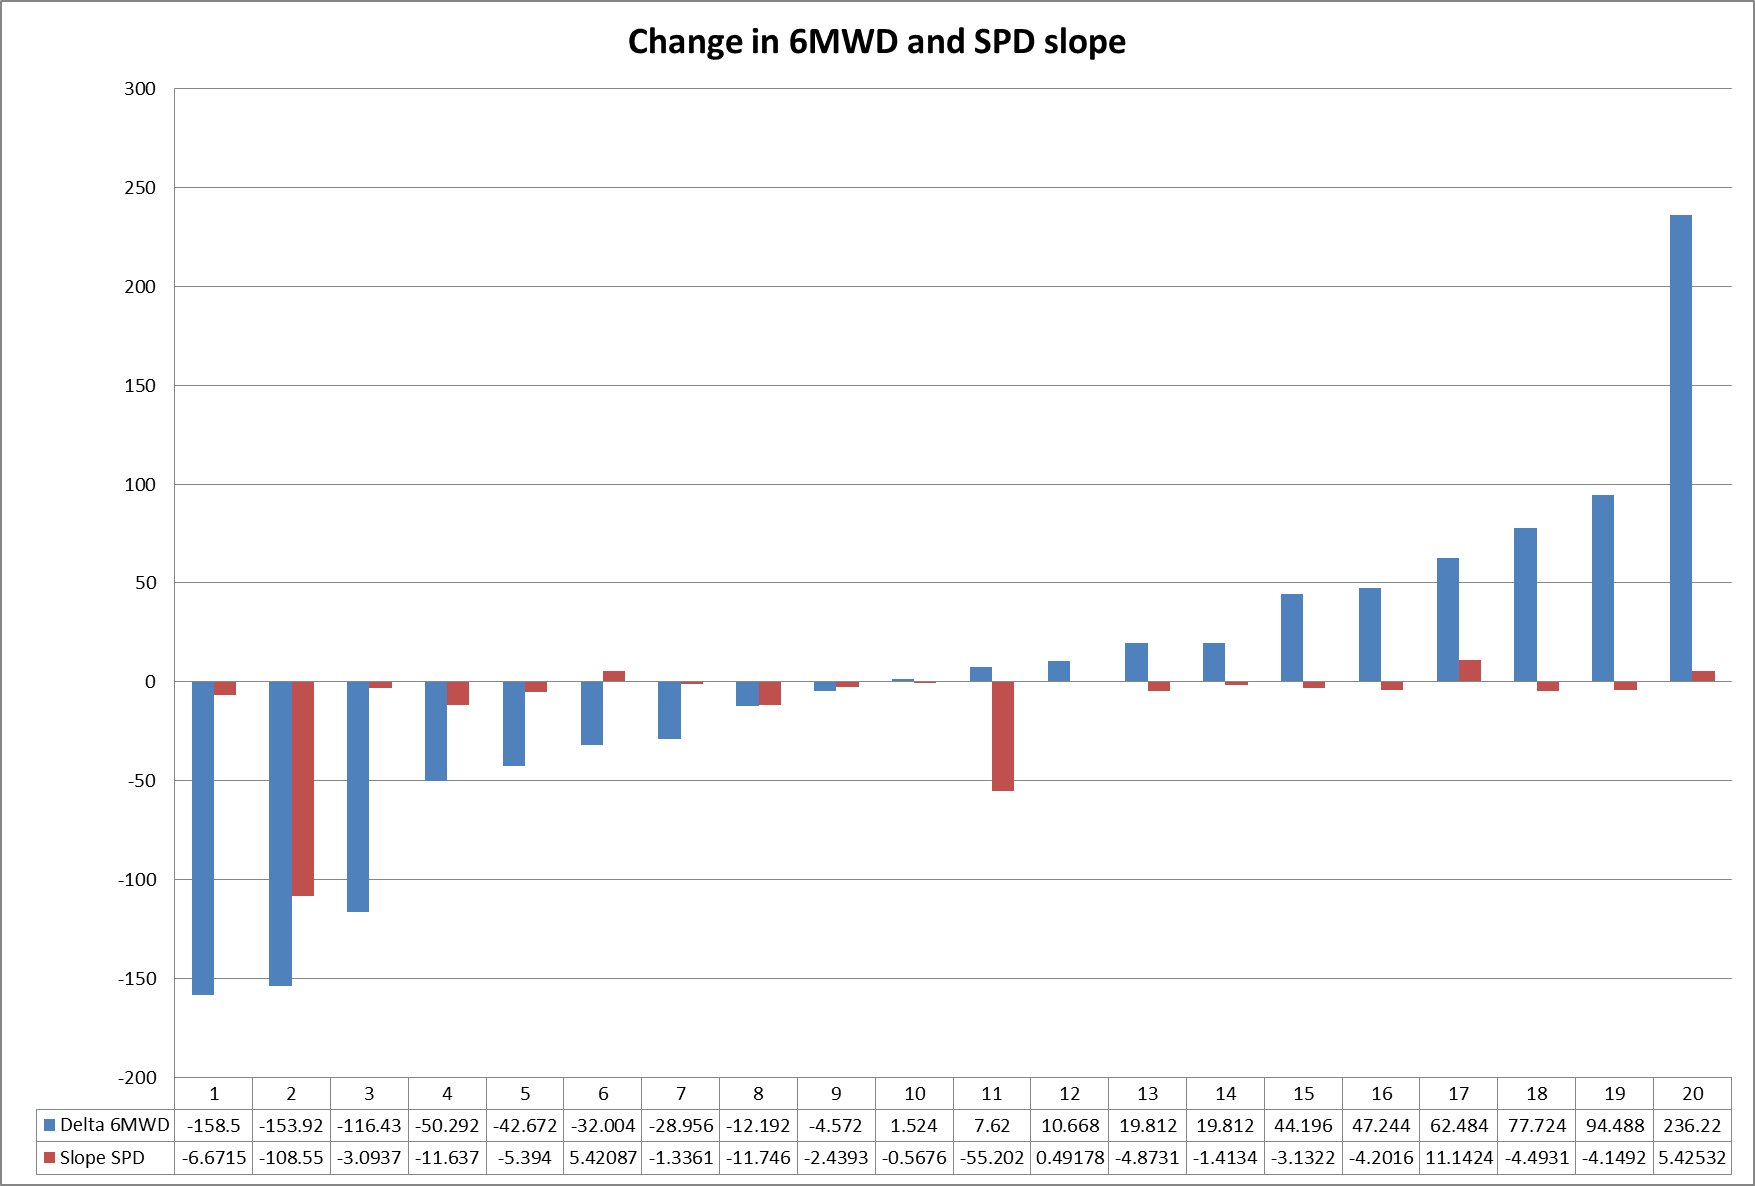
**

**Legend: X axis- Each number representing one patient (in ascending order of change in 6MWD), Y axis- Blue column- delta 6MWD (in meters) Red column- Slope of SPD over study duration**

**Figure S3: Compliance- 4A- pie chart representing compliance of all patients enrolled in the study. 4B- pie chart representing compliance of the sub group of patients who were able to use and sync the device at least once**


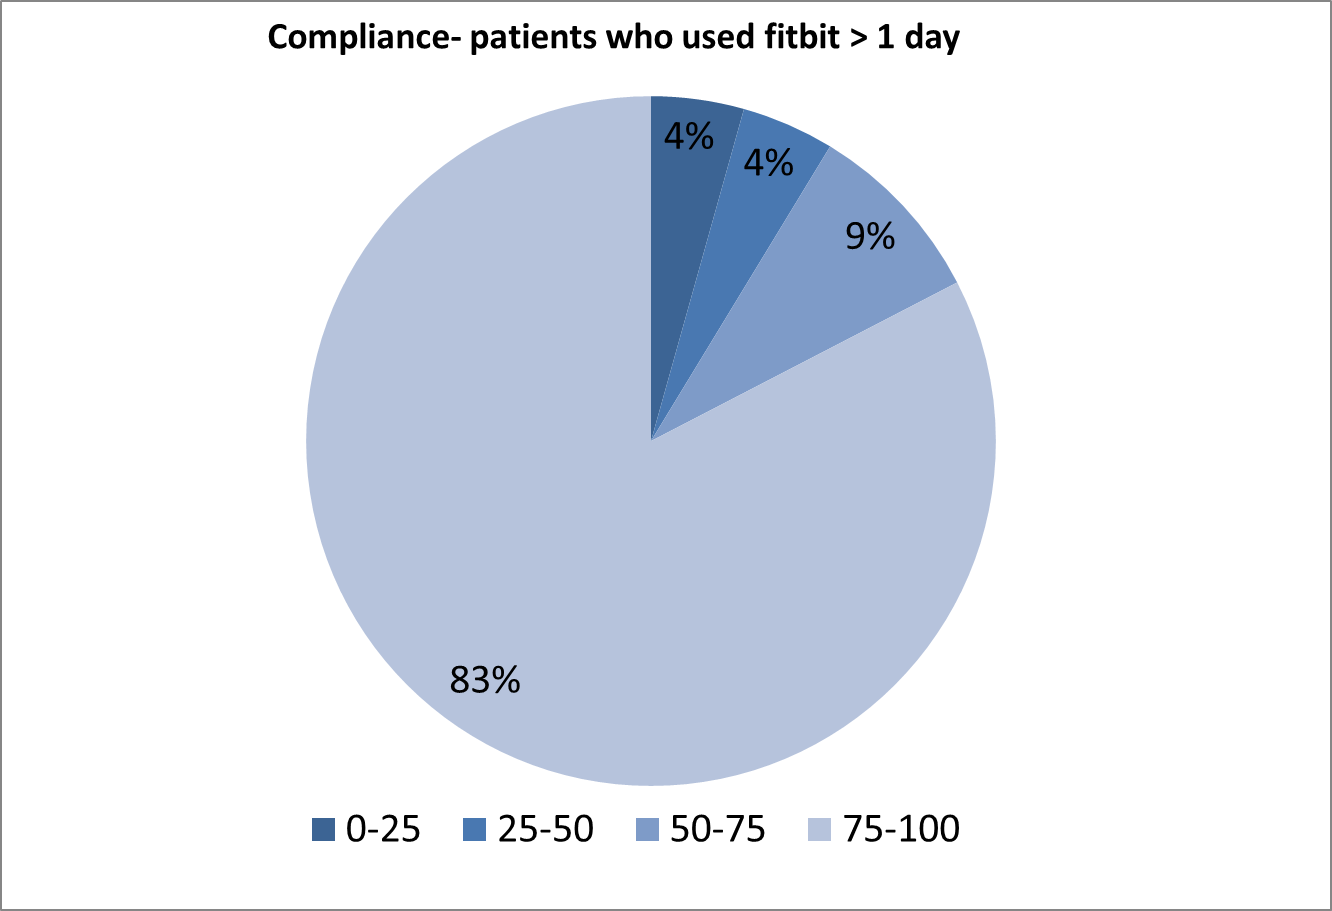

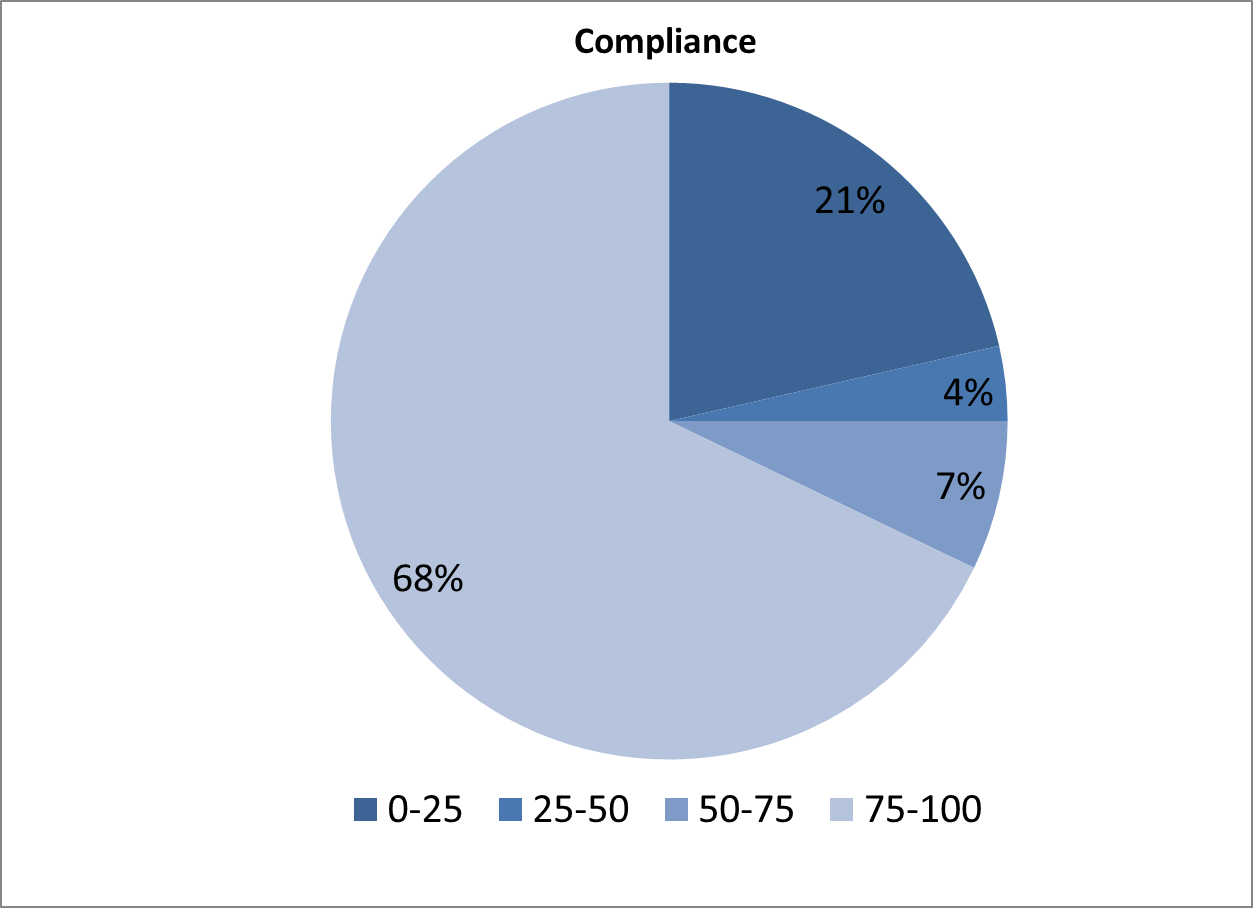

Supplement: MOESM1 [file 16758564]
